# Supplementary material for: Physicochemical Approach to Understanding the Structure, Conformation, and Activity of Mannan Polysaccharides
Source: PubMed Central journal article supplement (PMC8045027; doi:10.1021/acs.biomac.0c01659), 2021-03-17
Supplement: bm0c01659_si_001.pdf [file bm0c01659_si_001.pdf]

## Supporting Information

# A Physico-chemical approach to understanding the structure, the conformation, and the activity of mannan polysaccharides.

*Angela Casillo,<sup>a</sup> Antonio Fabozzi,<sup>a</sup> Irene Russo Krauss,<sup>a,b</sup> Ermenegilda Parrilli,<sup>a</sup> Caroline I. Biggs,<sup>c</sup> Matthew I. Gibson,<sup>c,d</sup> Rosa Lanzetta,<sup>a</sup> Marie-Sousai Appavou,<sup>e</sup> Aurel Radulescu,<sup>e</sup> Maria L. Tutino,<sup>a</sup> Luigi Paduano,<sup>a,b\*</sup> Maria M. Corsaro<sup>a\*</sup>*

<sup>a</sup> Department of Chemical Sciences, University of Naples “Federico II”, Complesso Universitario Monte S. Angelo, Via Cintia 4, 80126 Naples, Italy

<sup>b</sup> CSGI - Consorzio per lo Sviluppo dei Sistemi a Grande Interfase, Florence, Italy

<sup>c</sup> Department of Chemistry, University of Warwick, Coventry, CV4 7AL, UK

<sup>d</sup> Warwick Medical School, University of Warwick, Coventry, CV4 7AL, UK

<sup>e</sup> Jülich Centre for Neutron Science, Garching Forschungszentrum, Lichtenbergstrasse 1, D-857478 Garching bei München, Germany

---

\* E-mail address: [lpaduano@unina.it](mailto:lpaduano@unina.it) (Luigi Paduano); [corsaro@unina.it](mailto:corsaro@unina.it) (Maria Michela Corsaro)

**Figure S1.** Sephacryl S-400 HR gel filtration chromatogram profile of the precipitate from the growth medium from *P.arcticus* 273-4.

**Figure S2.**  $^1\text{H}$ - $^{13}\text{C}$  DEPT-HSQC spectrum of mannan from *P.arcticus* 273-4 (Mannan<sub>*P.arc.*</sub>). The spectrum was recorded in D<sub>2</sub>O at 298 K at 600 MHz.

**Figure S3.** Relevant section of 2D *F2*-coupled HSQC experiment of Mannan<sub>*P.arc.*</sub> measured in D<sub>2</sub>O at 298 K at 600 MHz.

**Figure S4.** Expansion of the  $^1\text{H}$ - $^{13}\text{C}$  HMBC spectrum of Mannan<sub>*P.arc.*</sub>. The spectrum was recorded in D<sub>2</sub>O at 298 K at 600 MHz.

**Figure S5.** Expansion of the  $^1\text{H}$ - $^1\text{H}$  NOESY spectrum of Mannan<sub>*P.arc.*</sub> measured at 298 K in D<sub>2</sub>O (150 ms as mixing time) at 600 MHz.

**Figure S6.** Expansion of the  $^1\text{H}$ - $^1\text{H}$  COSY spectrum of Mannan<sub>*P.arc.*</sub> measured in D<sub>2</sub>O at 298 K at 600 MHz.

**Figure S7.** Expansion of the  $^1\text{H}$ - $^1\text{H}$  TOCSY spectrum of Mannan<sub>*P.arc.*</sub> measured in D<sub>2</sub>O at 298 K at 600 MHz.

**Figure S8.** Expansion of  $^1\text{H}$ - $^{31}\text{P}$  HMBC of Mannan<sub>*P.arc.*</sub>. The spectrum was recorded in D<sub>2</sub>O at 298 K at 400 MHz.

**Figure S9.** Expansions of the  $^1\text{H}$ - $^{13}\text{C}$  DEPT-HSQC spectra of mannans from a) *P.arcticus* 273-4 (Mannan<sub>*P.arc.*</sub>), and b) *S. cerevisiae*. The spectra were recorded in D<sub>2</sub>O at 298 K at 600 MHz.

**Figure S10.**  $^1\text{H}$  NMR spectrum of the from *P. arcticus* (Mannan<sub>*P.arc.*</sub><sub>HF</sub>). The spectrum was recorded in D<sub>2</sub>O at 298 K at 600 MHz.

**Figure S11.**  $^1\text{H}$ - $^{13}\text{C}$  DEPT-HSQC spectrum of Mannan<sub>*P.arc.*</sub><sub>HF</sub>. The spectrum was recorded in D<sub>2</sub>O at 298 K at 600 MHz.

**Figure S12.** Expansion of the  $^1\text{H}$ - $^1\text{H}$  COSY spectrum of Mannan<sub>*P.arc.*</sub><sub>HF</sub> measured in D<sub>2</sub>O at 298 K at 600 MHz.

**Figure S13.** Expansion of the  $^1\text{H}$ - $^1\text{H}$  TOCSY spectrum of Mannan<sub>*P.arc.*</sub><sub>HF</sub> measured in D<sub>2</sub>O at 298 K at 600 MHz.

**Figure S14.** Expansion of the  $^1\text{H}$ - $^1\text{H}$  NOESY spectrum of Mannan<sub>*P.arc.*</sub><sub>HF</sub> measured at 298 K in D<sub>2</sub>O (150 ms as mixing time) at 600 MHz.

**Figure S15.** Expansion of the  $^1\text{H}$ - $^{13}\text{C}$  HMBC spectrum of Mannan<sub>*P.arc.*</sub><sub>HF</sub>. The spectrum was recorded in D<sub>2</sub>O at 298 K at 600 MHz.

**Figure S16.** Surface tension as a function of Mannan<sub>*P.arc.*</sub> (blue), Mannan<sub>Yeast</sub> (green) and Mannan<sub>*P.arc.*</sub><sub>HF</sub> (red) concentration at 25.0 °C.

**Figure S17.** Overlapped CD spectra of Mannan<sub>*P.arc.*</sub> (blue), Mannan<sub>Yeast</sub> (green) and Mannan<sub>*P.arc.*</sub><sub>HF</sub> (red) at 20 °C.

**Figure S18.** Normalized correlation functions for Mannan<sub>*P.arc.*</sub> (A), Mannan<sub>Yeast</sub> (B) and Mannan<sub>*P.arc.*</sub><sub>HF</sub> (C) at 6.3, 6.0 and 5.6 mg mL<sup>-1</sup>, respectively, and for Mannan<sub>*P.arc.*</sub> at 1 mg mL<sup>-1</sup> (D).

**Figure S19.** Cryo-TEM images collected on Mannan<sub>P.arc</sub>.

**Figure S20.** Kratky plot of SANS data for Mannan<sub>Yeast</sub>.

**Table S1.** <sup>1</sup>H and <sup>13</sup>C NMR assignments of Mannan<sub>P.arc\_HF</sub>. Spectra were recorded in D<sub>2</sub>O at 298 K at 600 MHz using acetone as external standard ( $\delta_{\text{H}}/\delta_{\text{C}}$  2.25/ 31.45 ppm).

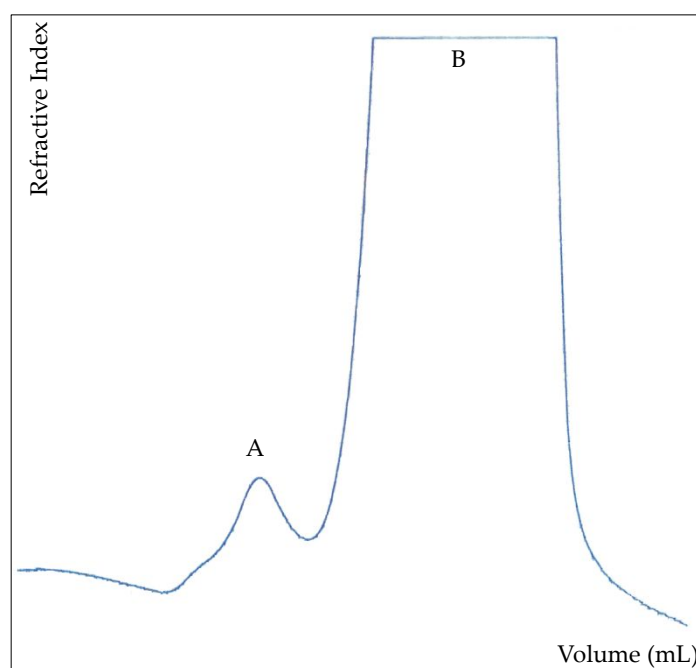

**Figure S1.** Sephacryl S-400 HR gel filtration chromatogram profile of the precipitate from the growth medium from *P.arcticus* 273-4.

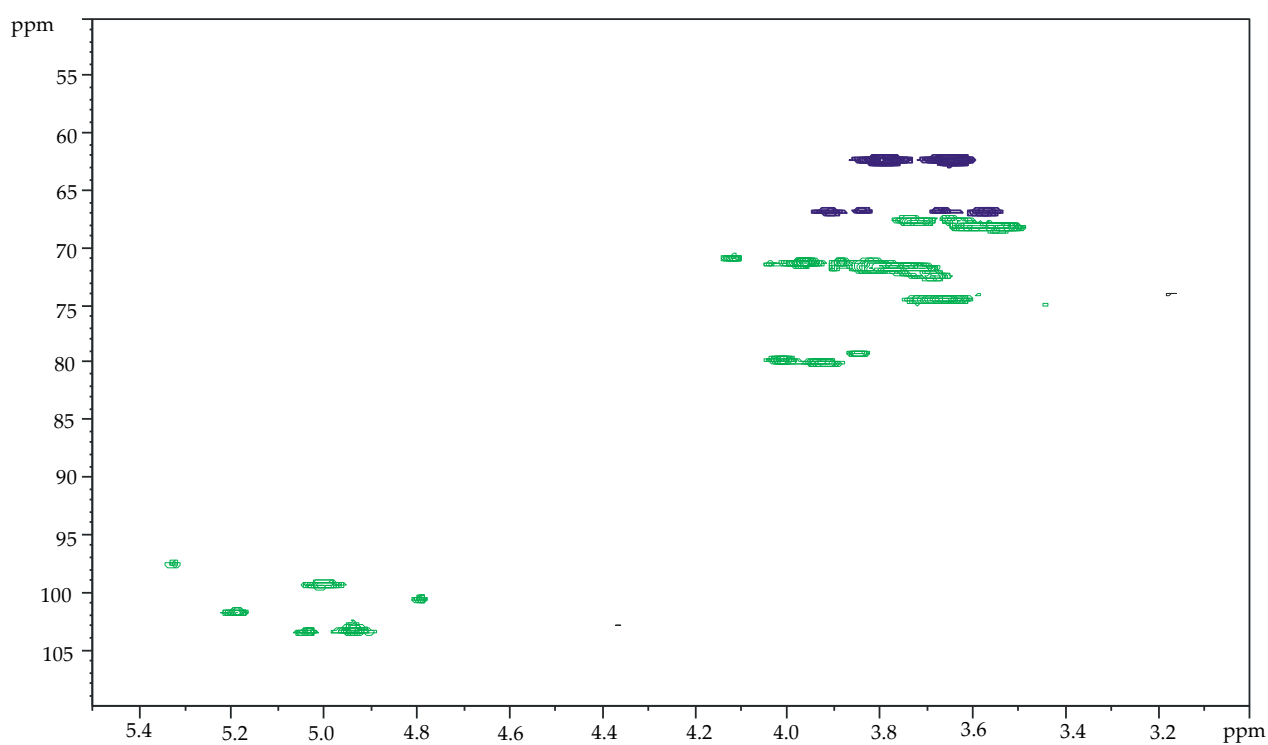

**Figure S2.** <sup>1</sup>H-<sup>13</sup>C DEPT-HSQC- spectrum of mannan from *P.arcticus* 273-4 (Mannan<sub>P.arc</sub>). The spectrum was recorded in D<sub>2</sub>O at 298 K at 600 MHz.

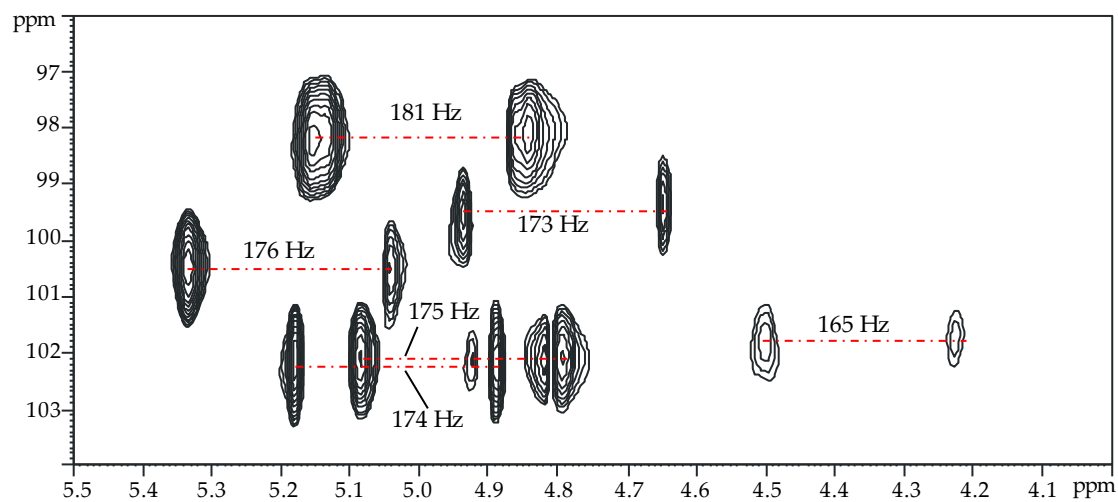

**Figure S3.** Relevant section of 2D  $F_2$ -coupled HSQC experiment of Mannan $P_{arc}$  measured in  $D_2O$  at 298 K at 600 MHz.

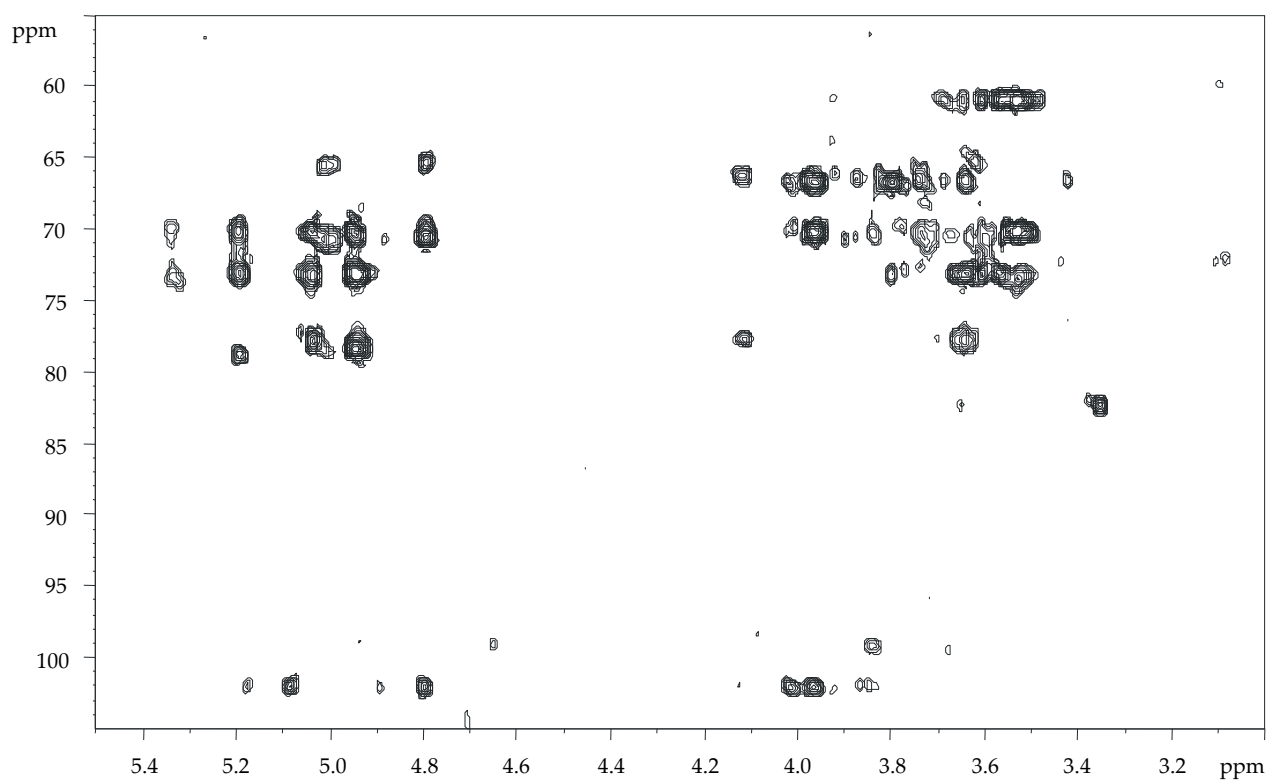

**Figure S4.** Expansion of the  $^1H$ - $^{13}C$  HMBC spectrum of Mannan $P_{arc}$ . The spectrum was recorded in  $D_2O$  at 298 K at 600 MHz.

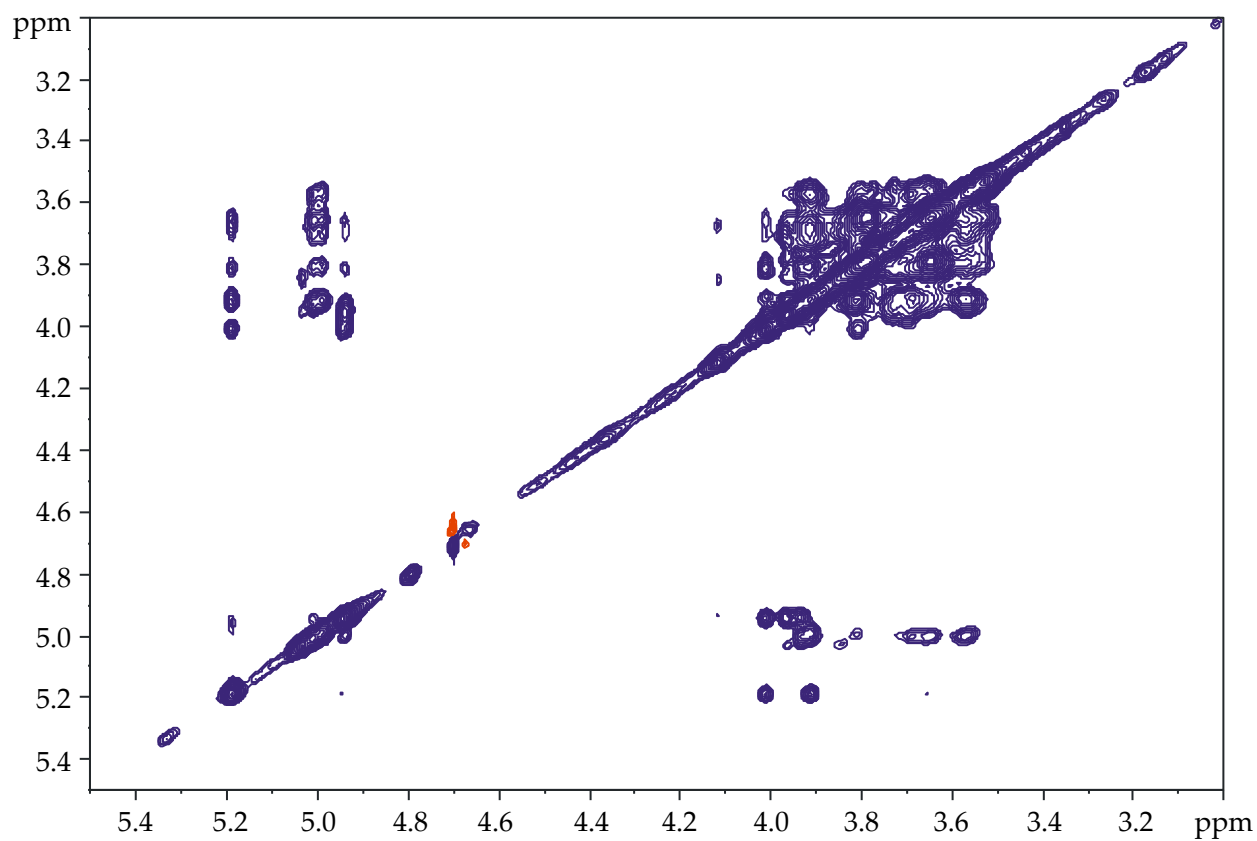

**Figure S5.** Expansion of the  $^1\text{H}$ - $^1\text{H}$  NOESY spectrum of Mannan $_{P.arc}$  measured at 298 K in  $\text{D}_2\text{O}$  (150 ms as mixing time) at 600 MHz.

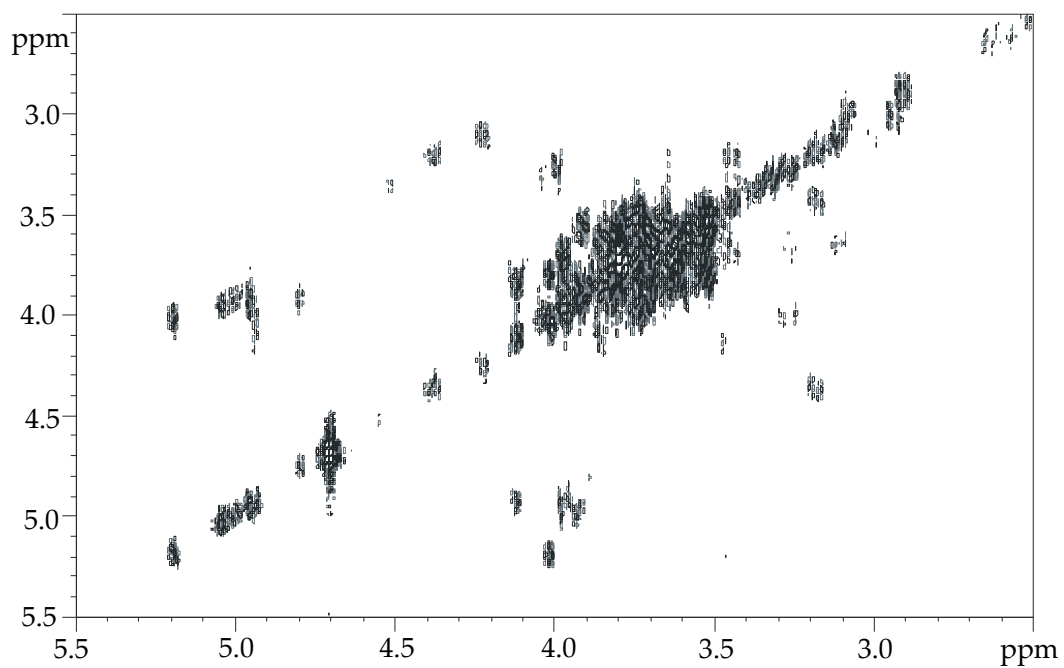

**Figure S6.** Expansion of the  $^1\text{H}$ - $^1\text{H}$  COSY spectrum of Mannan $_{P.arc}$  measured in  $\text{D}_2\text{O}$  at 298 K at 600 MHz.

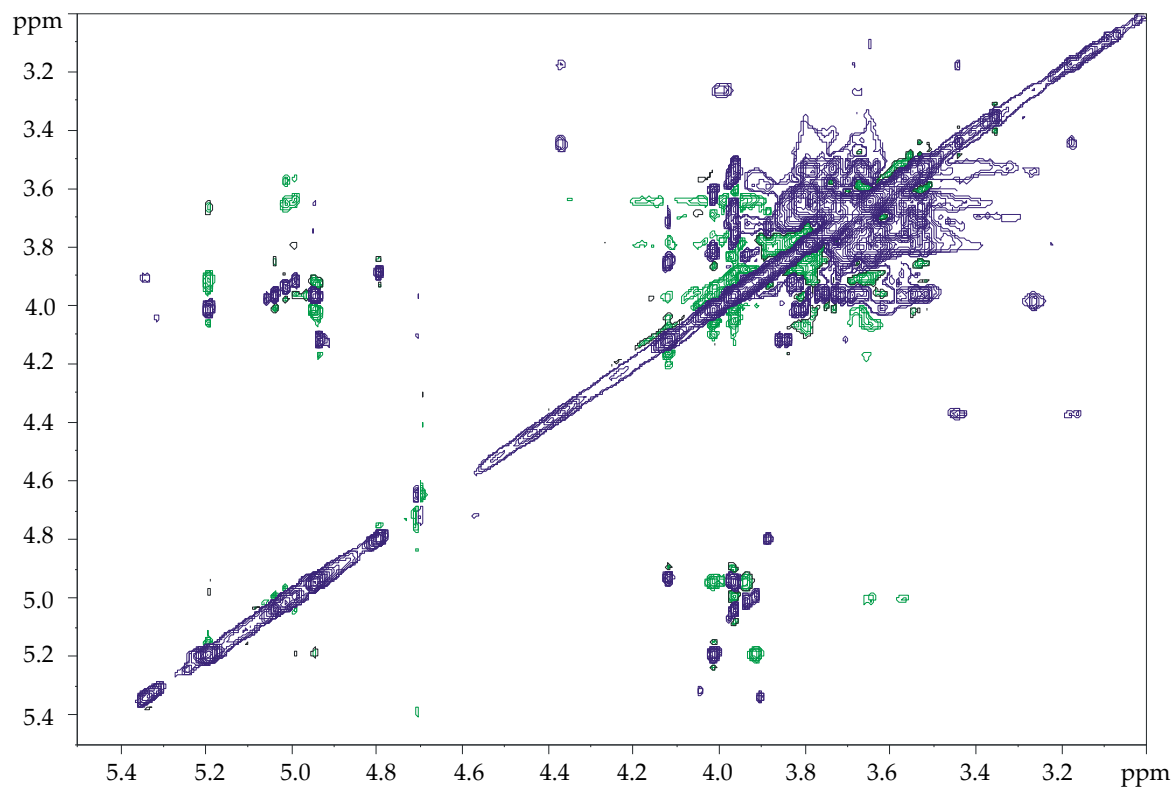

**Figure S7.** Expansion of the  $^1\text{H}$ - $^1\text{H}$  TOCSY spectrum of Mannan $_{P.arc}$  measured in  $\text{D}_2\text{O}$  at 298 K at 600 MHz.

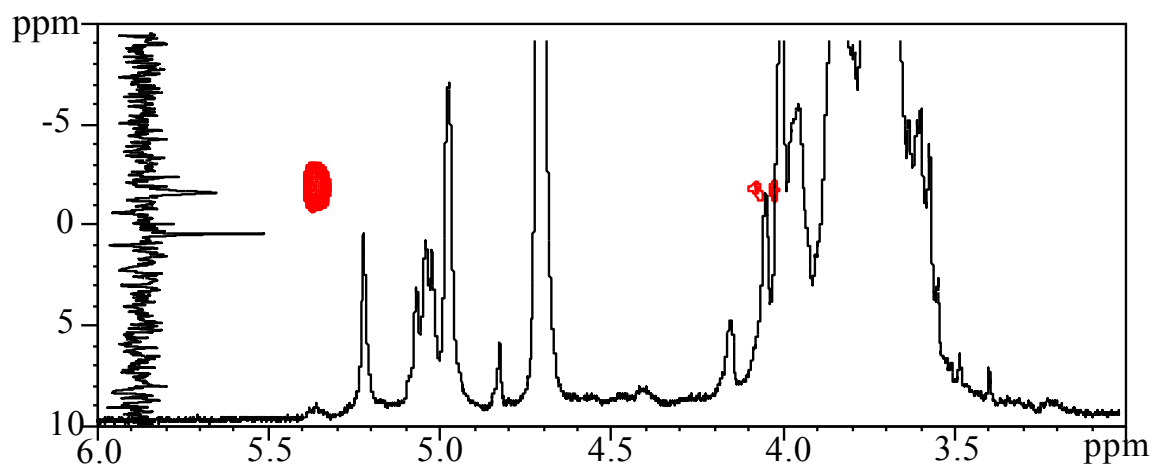

**Figure S8.** Expansion of  $^1\text{H}$ - $^{31}\text{P}$  HMBC of Mannan $_{P.arc}$ . The spectrum was recorded in  $\text{D}_2\text{O}$  at 298 K at 400 MHz.

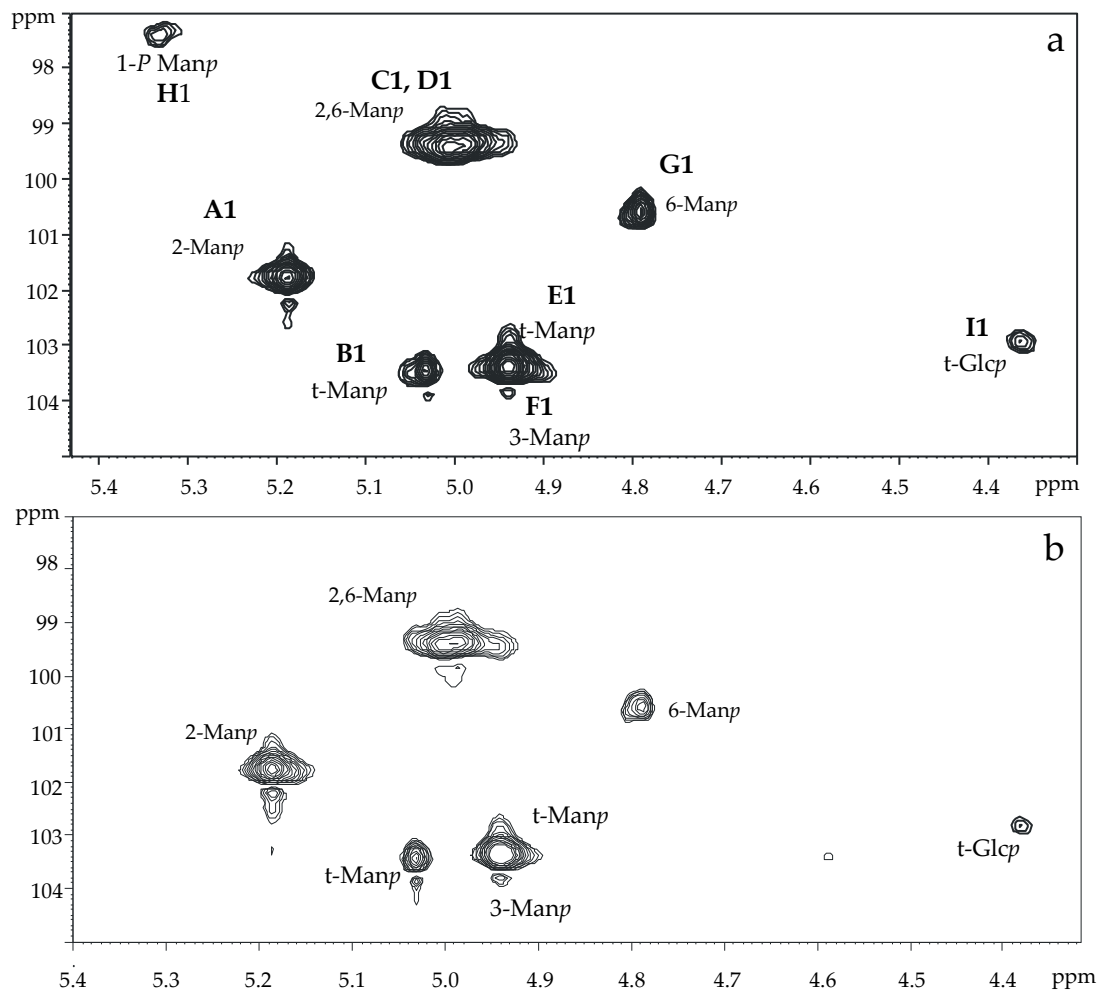

**Figure S9.** Expansions of the  $^1\text{H}$ - $^{13}\text{C}$  DEPT-HSQC spectra of mannans from a) *P. arcticus* 273-4 (Mannan<sub>*P. arc.*</sub>), and b) *S. cerevisiae*. The spectra were recorded in  $\text{D}_2\text{O}$  at 298 K at 600 MHz.



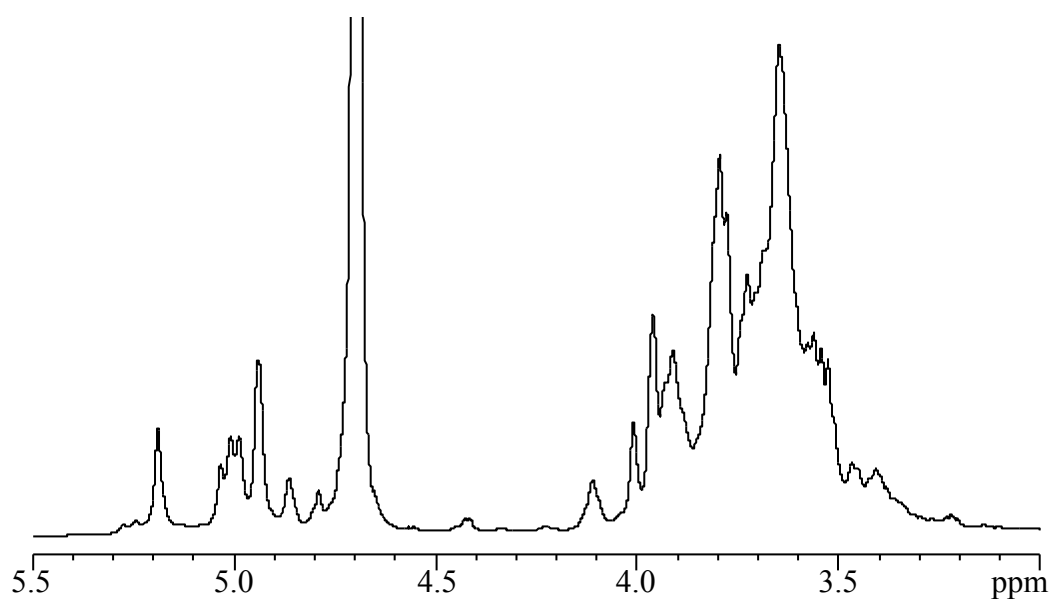

**Figure S10.**  $^1\text{H}$  NMR spectrum of the from *P. arcticus* (Mannan $_{P.arc\_HF}$ ). The spectrum was recorded in  $\text{D}_2\text{O}$  at 298 K at 600 MHz.

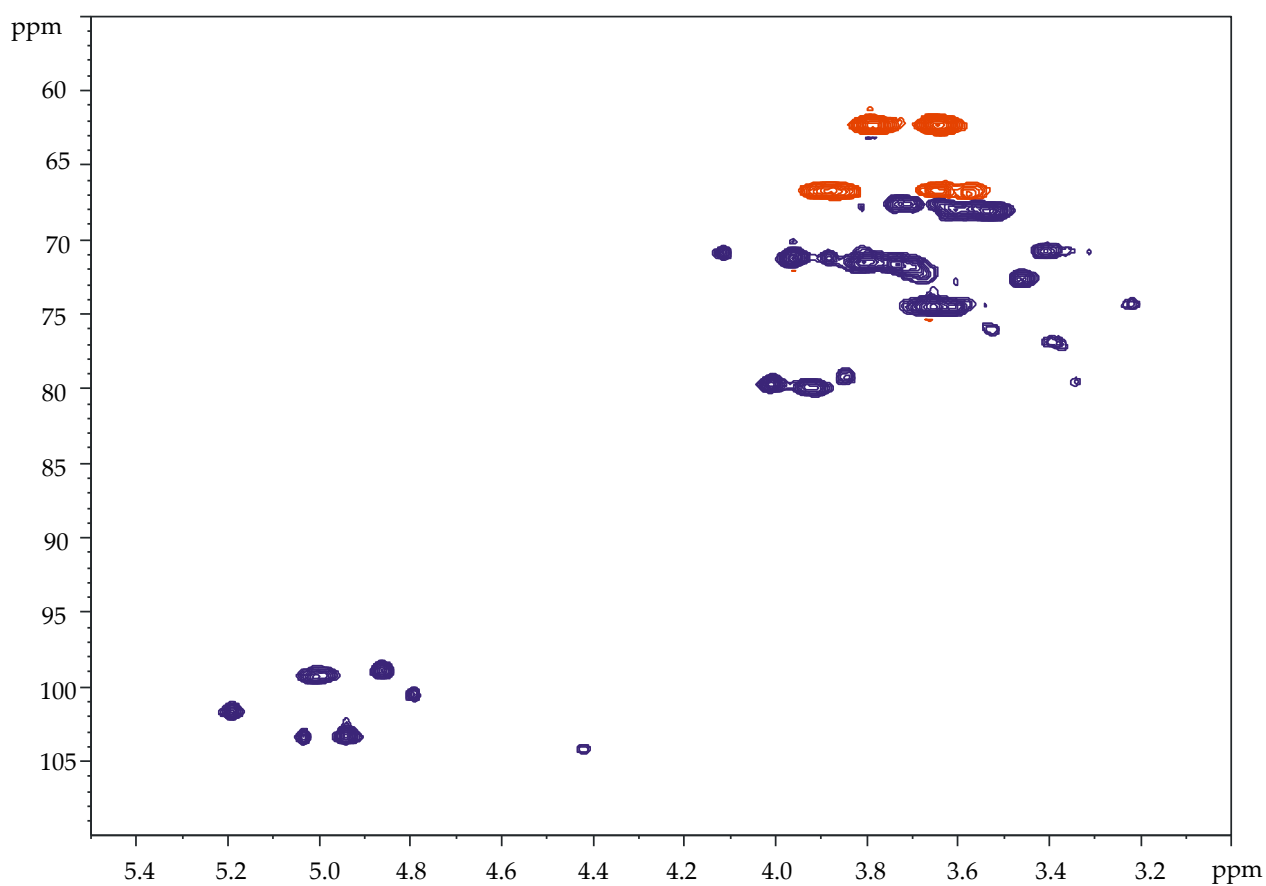

**Figure S11.**  $^1\text{H}$ - $^{13}\text{C}$  DEPT-HSQC spectrum of Mannan $_{P.arc\_HF}$ . The spectrum was recorded in  $\text{D}_2\text{O}$  at 298 K at 600 MHz.

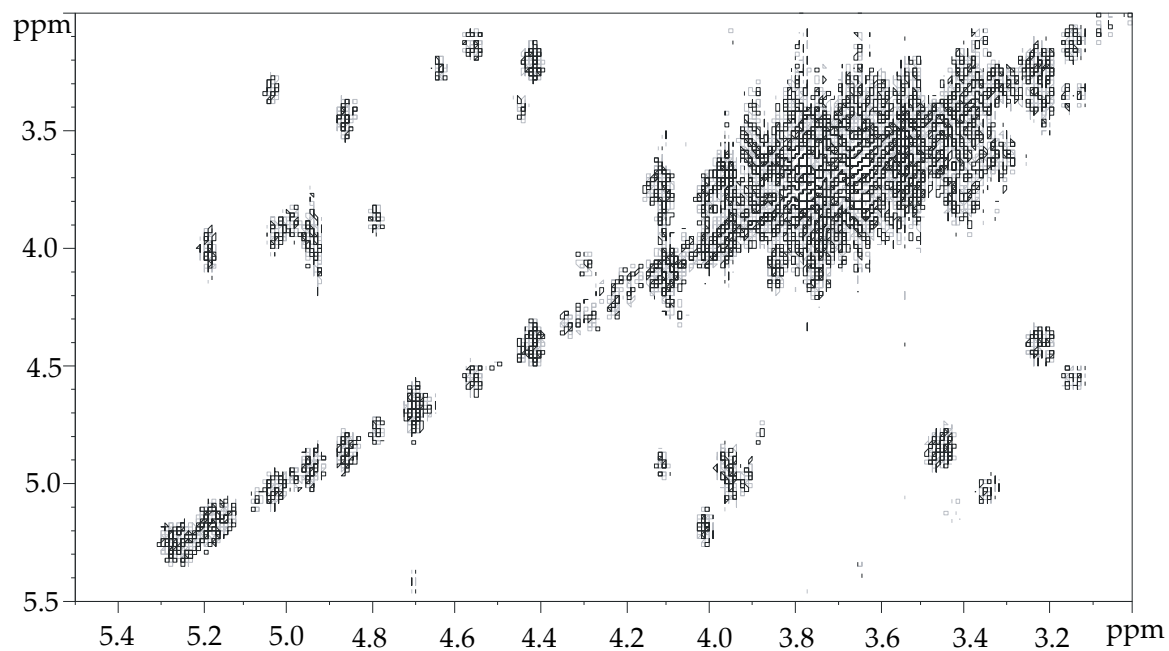

**Figure S12.** Expansion of the  $^1\text{H}$ - $^1\text{H}$  COSY spectrum of Mannan $_{P.arc\_HF}$  measured in  $\text{D}_2\text{O}$  at 298 K at 600 MHz.

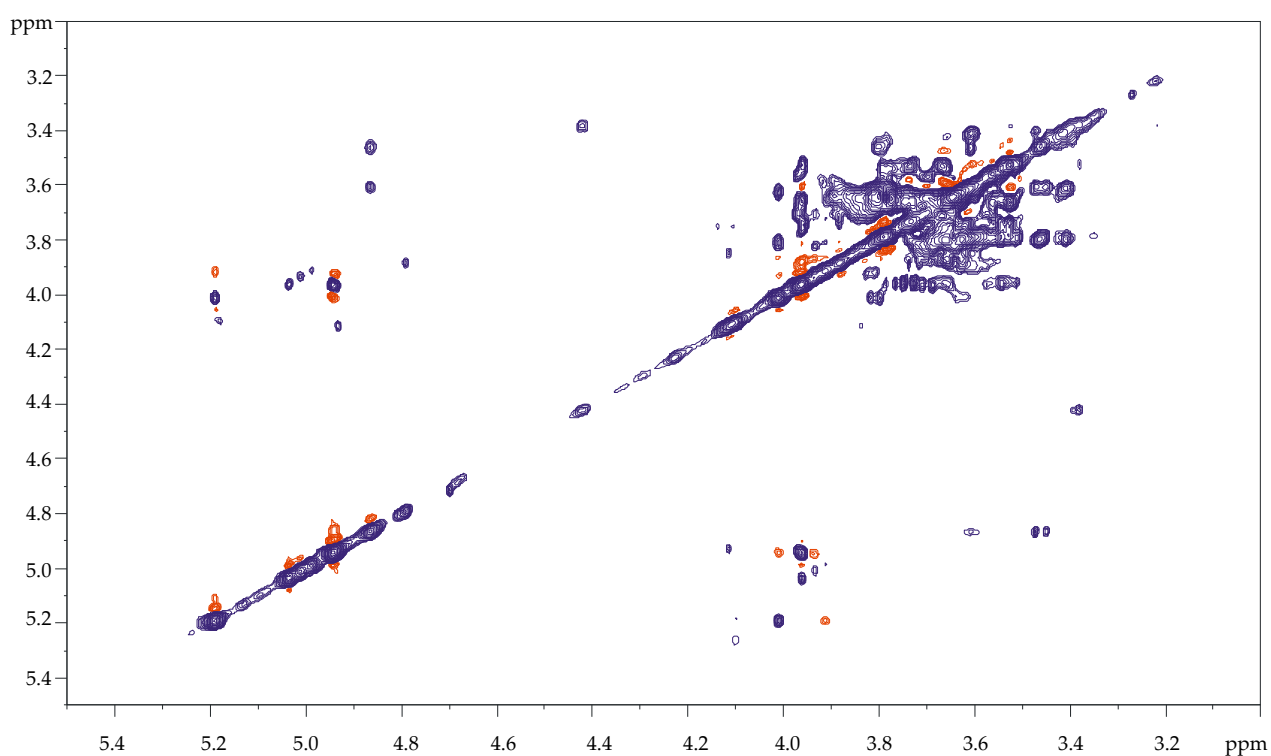

**Figure S13.** Expansion of the  $^1\text{H}$ - $^1\text{H}$  TOCSY spectrum of Mannan $_{P.arc\_HF}$  measured in  $\text{D}_2\text{O}$  at 298 K at 600 MHz.

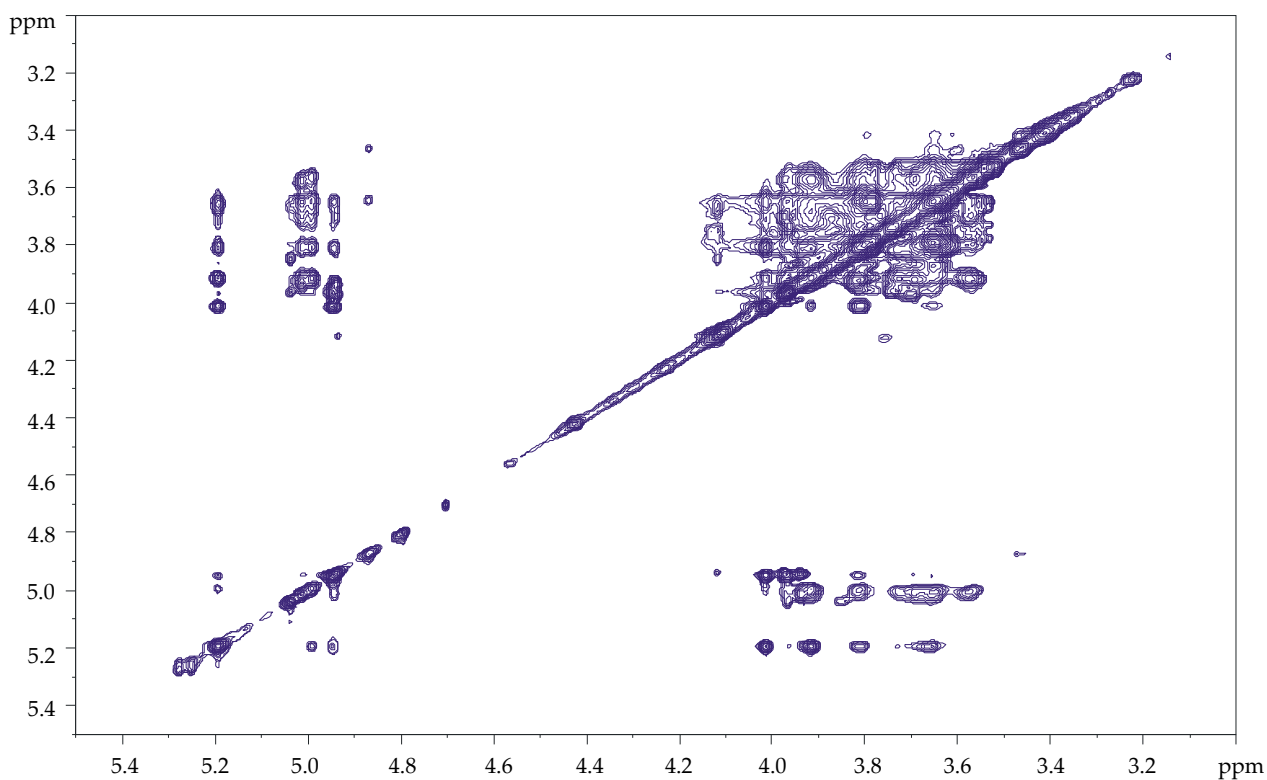

**Figure S14.** Expansion of the  $^1\text{H}$ - $^1\text{H}$  NOESY spectrum of Mannan $_{P.arc\_HF}$  measured at 298 K in  $\text{D}_2\text{O}$  (150 ms as mixing time) at 600 MHz.

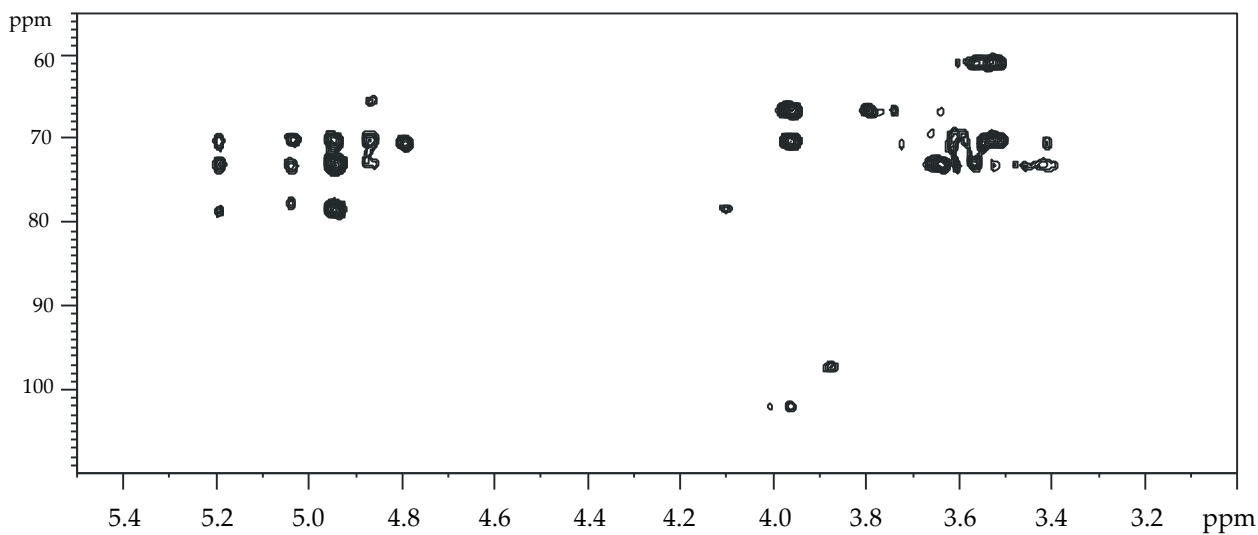

**Figure S15.** Expansion of the  $^1\text{H}$ - $^{13}\text{C}$  HMBC spectrum of Mannan $_{P.arc\_HF}$ . The spectrum was recorded in  $\text{D}_2\text{O}$  at 298 K at 600 MHz.

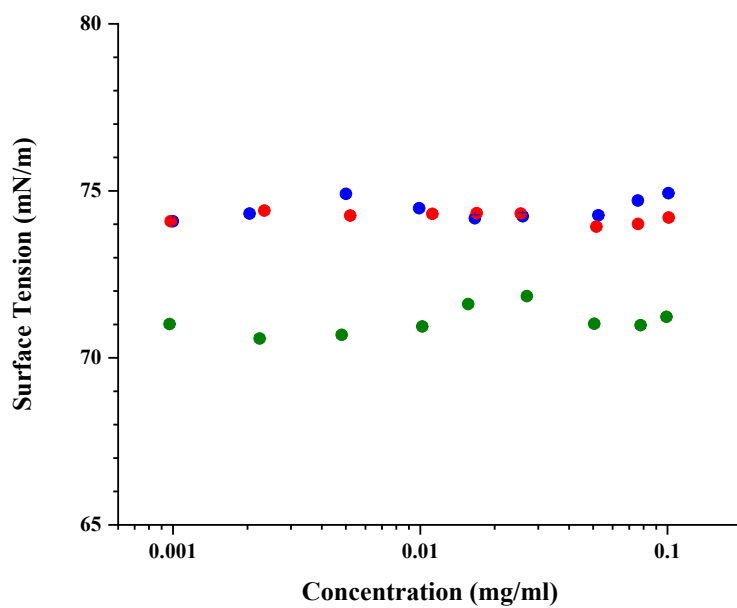

**Figure S16.** Surface tension as a function of Mannan<sub>P.arc</sub> (blue), Mannan<sub>Yeast</sub> (green) and Mannan<sub>P.arc\_HF</sub> (red) concentration at 25.0 °C.

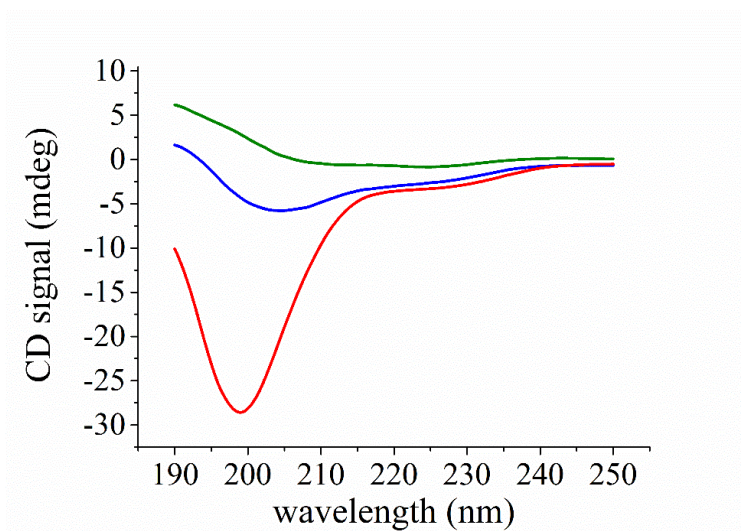

**Figure S17.** Overlapped CD spectra of Mannan<sub>P.arc</sub> (blue), Mannan<sub>Yeast</sub> (green) and Mannan<sub>P.arc\_HF</sub> (red) at 20 °C.

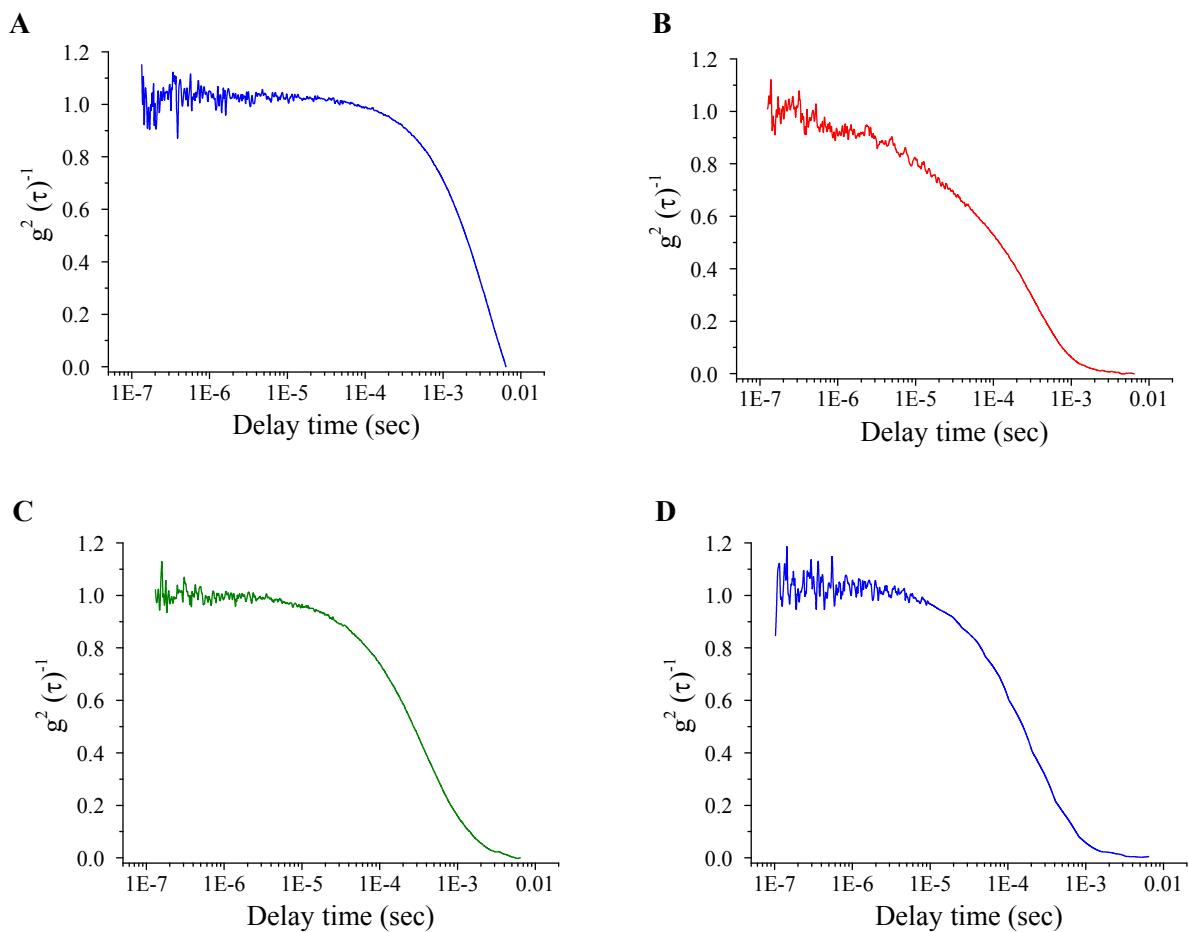

**Figure S18.** Normalized correlation functions for Mannan<sub>*P.arc*</sub> (A), Mannan<sub>Yeast</sub> (B) and Mannan<sub>*P.arc*\_HF</sub> (C) at 6.3, 6.0 and 5.6 mg mL<sup>-1</sup>, respectively, and for Mannan<sub>*P.arc*</sub> at 1 mg mL<sup>-1</sup> (D).

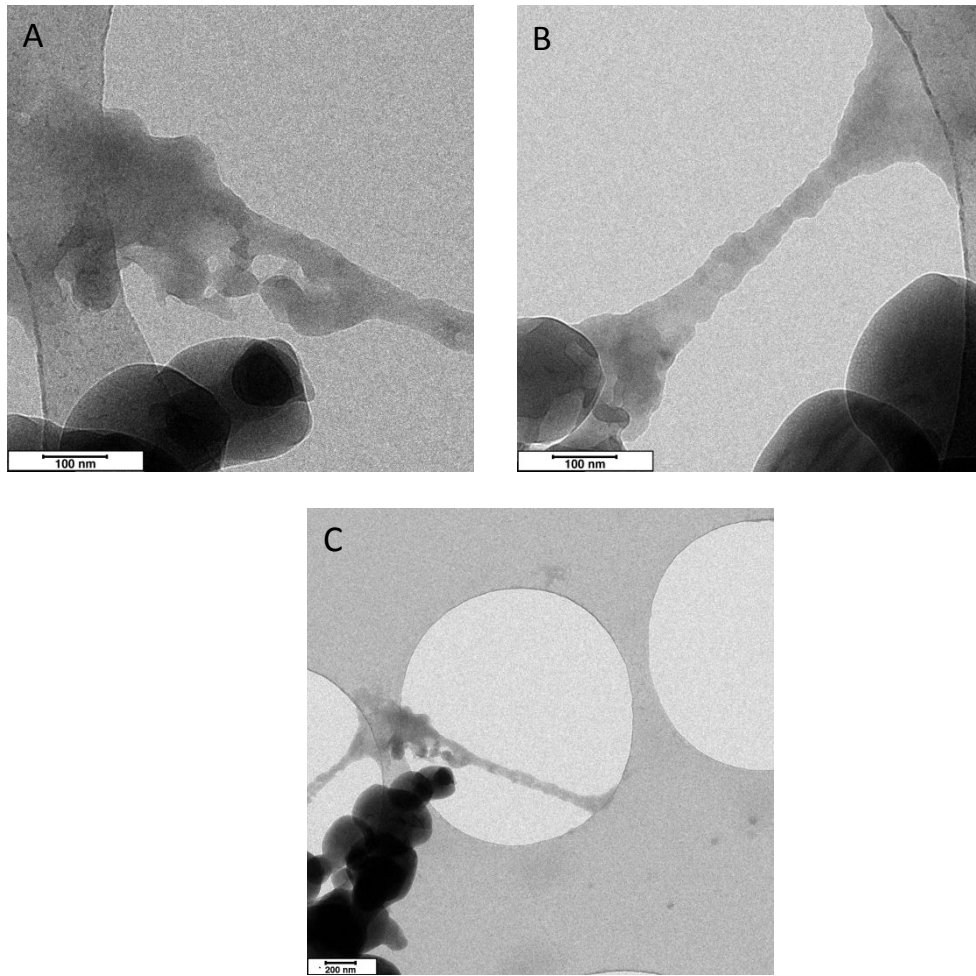

**Figure S19.** Cryo-TEM images collected on Mannan<sub>P.arc</sub>.

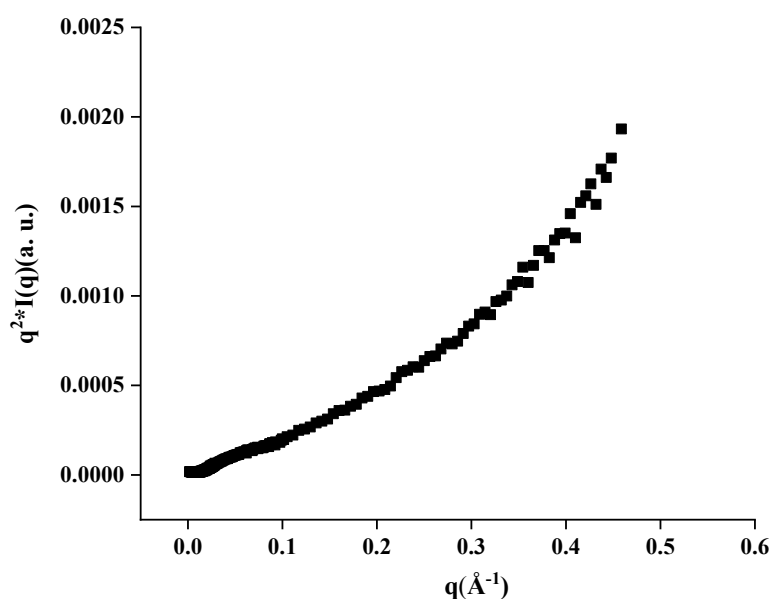

**Figure S20.** Kratky plot of SANS data for Mannan<sub>Yeast</sub>.

**Table S1.** <sup>1</sup>H and <sup>13</sup>C NMR assignments of Mannan<sub>P.arc\_HF</sub>. Spectra were recorded in D<sub>2</sub>O at 298 K at 600 MHz using acetone as external standard ( $\delta_H/\delta_C$  2.25/ 31.45 ppm).

| Sugar Residue  | <sup>1</sup> H/ <sup>13</sup> C |      |      |      |      |           |
|----------------|---------------------------------|------|------|------|------|-----------|
|                | 1                               | 2    | 3    | 4    | 5    | 6         |
| <b>A</b>       | 5.19                            | 4.01 | 3.81 | 3.63 | 3.66 | 3.64-3.79 |
| 2-Manp         | 101.8                           | 79.7 | 71.6 | 68.1 | 74.5 | 62.3      |
| <b>B</b>       | 5.04                            | 3.96 | 3.75 | 3.53 | 3.66 | 3.64-3.78 |
| <i>t</i> -Manp | 103.5                           | 71.3 | 71.6 | 68.2 | 74.5 | 62.4      |
| <b>C</b>       | 5.01                            | 3.93 | 3.83 | 3.73 | 3.70 | 3.58-3.89 |
| 2,6-Manp       | 99.4                            | 80.0 | 71.4 | 67.8 | 72.1 | 66.9      |
| <b>D</b>       | 4.99                            | 3.91 | 3.81 | 3.73 | 3.70 | 3.58-3.89 |
| 2,6-Manp       | 99.4                            | 80.0 | 71.5 | 67.8 | 72.1 | 66.9      |
| <b>E</b>       | 4.94                            | 3.96 | 3.70 | 3.53 | 3.66 | 3.64-3.79 |
| <i>t</i> -Manp | 103.4                           | 71.3 | 71.7 | 68.1 | 74.4 | 62.4      |
| <b>F</b>       | 4.93                            | 4.11 | 3.84 | 3.72 | 3.69 | 3.64-3.79 |
| 3-Manp         | 103.5                           | 70.9 | 79.2 | 67.6 | 72.5 | 62.4      |
| <b>G</b>       | 4.79                            | 3.88 | 3.73 | 3.59 |      | 3.64-3.87 |
| 6-Manp         | 100.6                           | 71.3 | 71.7 | 68.1 | 72.1 | 66.7      |
| <b>G'</b>      | 4.86                            | 3.46 | 3.60 | 3.60 | 3.41 | 3.65-3.87 |
| 6-Manp         | 99.0                            | 72.7 | 74.6 | 68.0 | 70.8 | 66.7      |
| <b>I</b>       | 4.42                            | 3.22 | 3.38 | 3.32 | 3.53 | 3.64-3.79 |
| <i>t</i> -GlcP | 104.3                           | 74.4 | 76.7 | 70.9 | 76.1 | 62.4      |
